# Supplementary material
Source: PubMed Central journal article supplement (PMC5839143)
Supplement: NIHMS836247-supplement-supplemental_data.pdf [file NIHMS836247-supplement-supplemental_data.pdf]

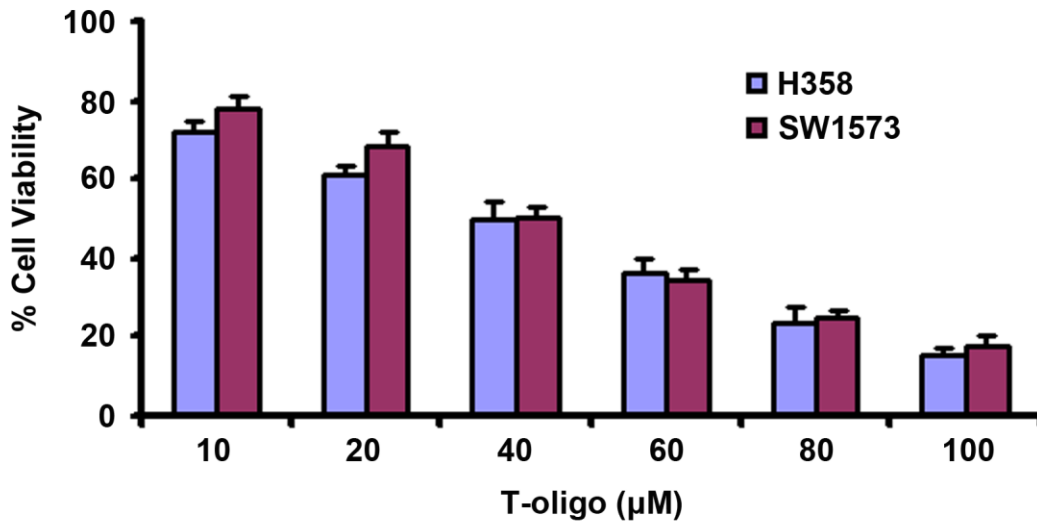

### Supplementary Figure 1S

Treatment with T-oligo decreases NSCLC cell proliferation in H358 and SW1573 cell lines. H358 and SW1573 NSCLC cells were treated with 10, 20, 40, 60, 80, and 100 µM T-oligo and complementary oligonucleotide concentrations for 96 hrs and then evaluated for cellular proliferation after trypan blue exclusion. NSCLC cell lines exhibited a 28-85% (H358) and a 22-82% (SW1573) decrease in cell viability after treatment with concentrations varying from 10 µM to 100 µM of T-oligo. Our results indicate that T-oligo inhibits proliferation in NSCLC in a dose dependent manner.
